# Supplementary material for: Very high spatial and temporal resolution rainfall data for accurate flood inundation modelling
Source: Copernicus journal article supplement (doi:10.5194/hess-2024-228), 2024-10-14
Supplement: Supplementary file [file hess-2024-228-CC2-supplement.pdf]

The need for better spatial and temporal resolutions of hydrological data has been an ongoing demand by researchers. To meet the demand, for example, with the advancement of technology and resources, the joint collaboration of NASA and USGS has decided to improve the spatial and temporal resolutions of its Landsat products (e.g., Landsat 8, 9) by 2030 with the impending introduction of Landsat NEXT, which is expected to have a spatial resolution of 10 m for some of the bands. In this manuscript, the authors propose a methodology to generate gridded rainfall data for a river basin in Australia. The spatial and temporal resolutions of the generated data are 1 km and 1 h, respectively. The proposed methodology is based on a thin-plate spline interpolation model that was introduced in 1990. The authors claim that the generated gridded rainfall data has outperformed the other sources of rainfall data available in Australia.

The current version of the manuscript has many flaws. I suggest the authors go through the video on how to write a research paper (<https://www.egu.eu/webinars/229/how-to-write-a-research-paper/>). Although the presentation is not the best on the topic, I believe that it has something to grasp. Thanks to the UK (University of Leeds), even after Brexit, it is playing the role of gladiator to safeguard the education system of the EU.

1) The title of the manuscript needs to be examined by the journal office. I presume that the journal office has appointed a handling editor and referees after going through their academic transcripts and their PhD works.

There is a need to understand the way titles have been coined in manuscripts in this journal office. For example, recently, in this journal office, the handling editor published a manuscript authored by Google Research. The title of the manuscript is Never Train a Long Short-Term Memory (LSTM) Network on a Single Basin. Is there a verb in the title? The title of this manuscript is "VERY HIGH spatial and temporal resolution rainfall data for accurate flood inundation modeling." Is there a verb in the title? To evaluate the quality of the review process of the journal office, it would be more appropriate to conduct research to examine the titles of the manuscripts that have been published by the journal office since the establishment of the journal.

2) See the attached file(Figure 2\_3.pdf). Are the figures correct? Have you pasted incorrectly? I am expecting the investors of the journal office to spend a few euros to develop an AI/ML-generated model to do a preliminary check on the manuscripts that are submitted to this journal office.

3) Refer to PART II
